# Supplementary material
Source: PubMed Central journal article supplement (PMC8651921)

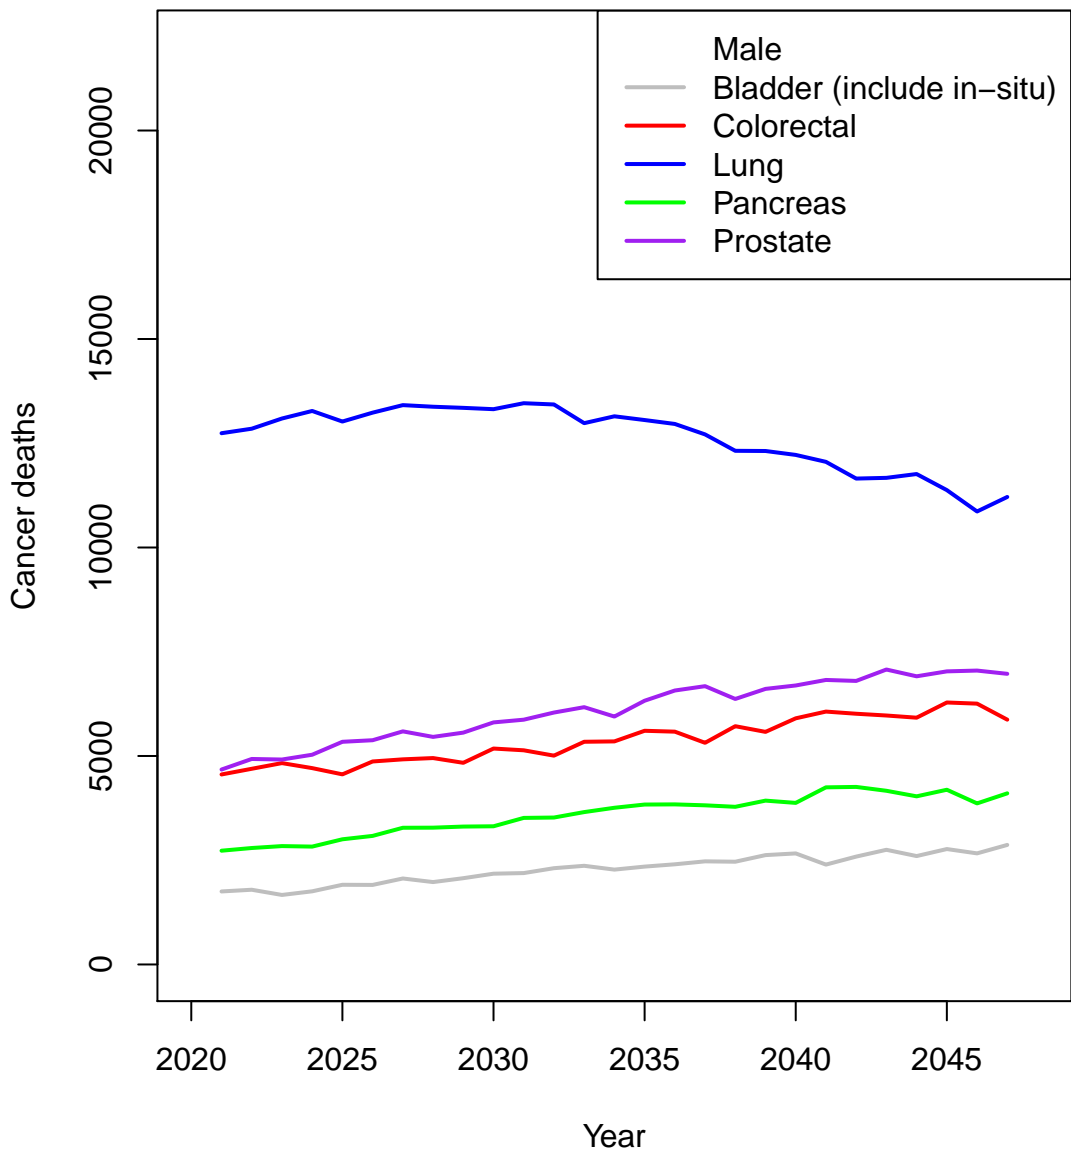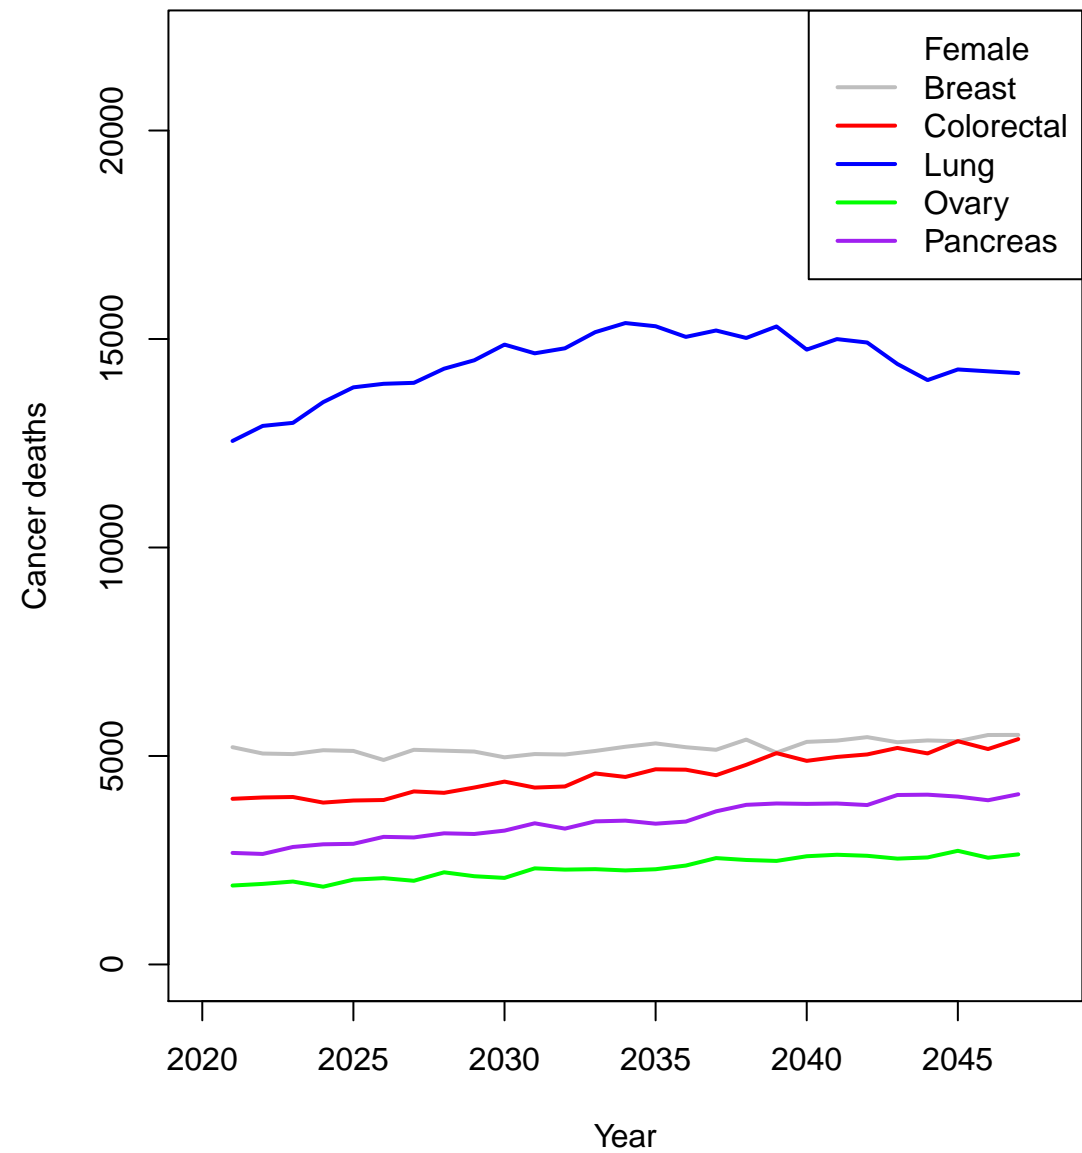

Supplement: 41997_2020_455_MOESM1_ESM.pdf [file 41997_2020_455_MOESM1_ESM.pdf]
